# Supplementary material for: Characterization of the Key Aroma Compounds in Different Aroma Types of Chinese Yellow Tea
Source: MDPI journal article supplement (doi:10.3390/foods12010027), 2022-12-21
Supplement: s1 [file s1]

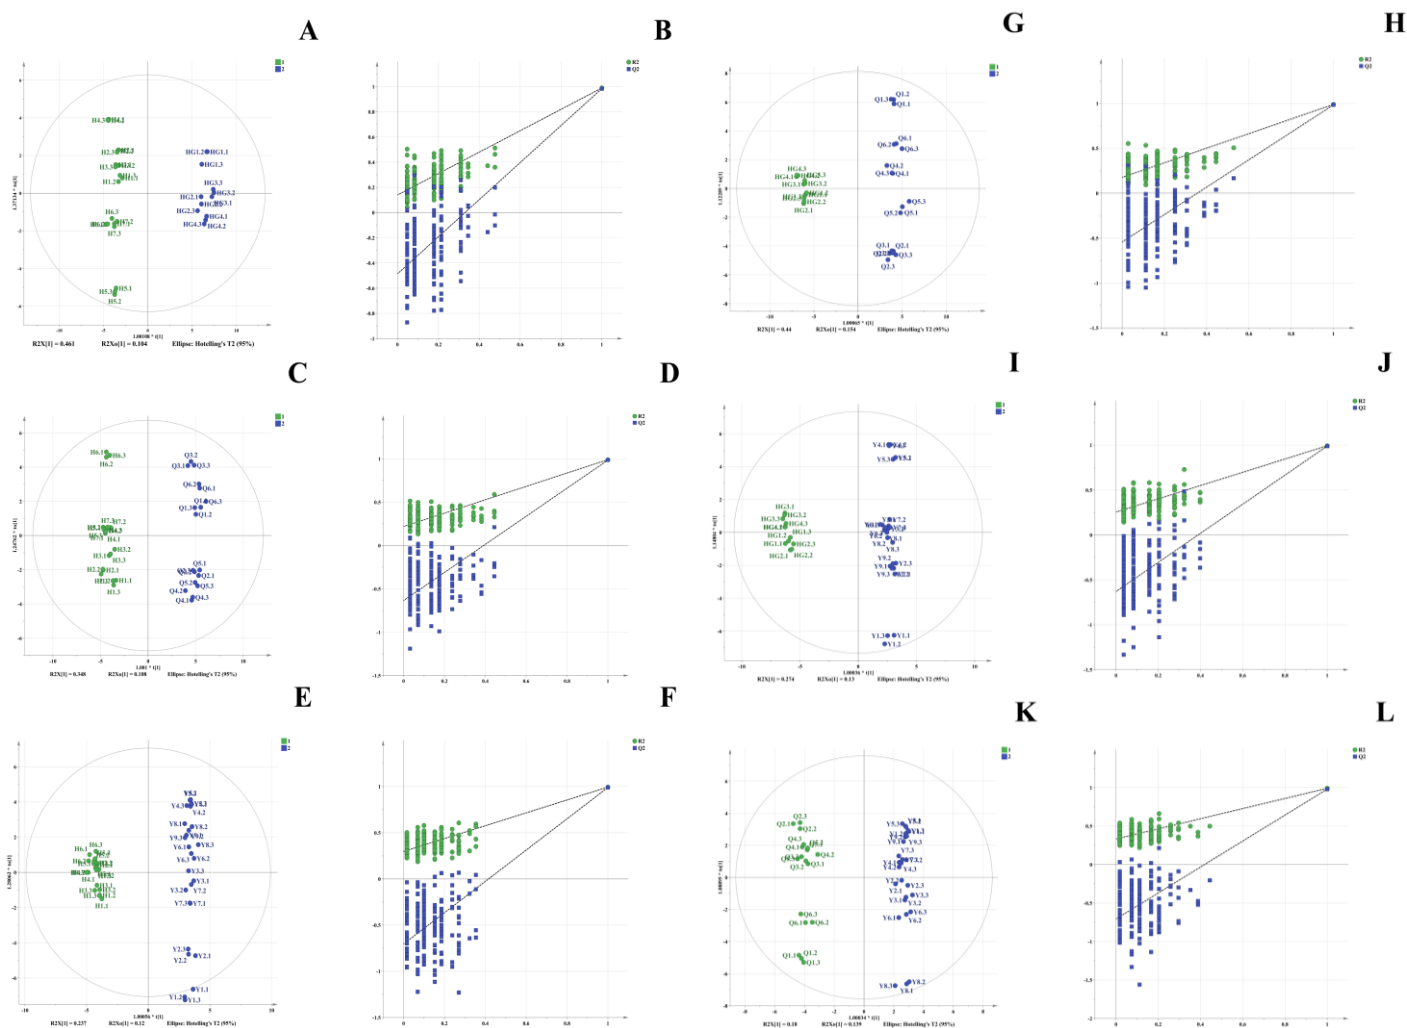

**Figure S2.** Score plot of OPLS-DA 1 for floral fragrance type versus high-fired fragrance type with R2X (cum): 0.565, R2Y (cum): 0.989, Q2 (cum): 0.984 (A) and permutation testing of the OPLS-DA 1 (B); Score plot of OPLS-DA 2 for floral fragrance type versus fresh fragrance type with R2X (cum): 0.557, R2Y (cum): 0.99, Q2 (cum): 0.985 (C) and permutation testing of the OPLS-DA 2 (D); Score plot of OPLS-DA 3 for floral fragrance type versus corn-like fragrance type with R2X (cum): 0.504, R2Y (cum): 0.993, Q2 (cum): 0.989 (E) and Permutation testing of the OPLS-DA 3 (F); Score plot of OPLS-DA 4 for floral fragrance type versus fresh fragrance type with R2X (cum): 0.595, R2Y (cum): 0.989, Q2 (cum): 0.985 (G) and permutation testing of the OPLS-DA 4 (H); Score plot of OPLS-DA 5 for floral fragrance type versus fresh fragrance type with R2X (cum): 0.511, R2Y (cum): 0.994, Q2 (cum): 0.99 (I) and permutation testing of the OPLS-DA 5 (J); Score plot of OPLS-DA 6 for floral fragrance type versus fresh fragrance type with R2X (cum): 0.479, R2Y (cum): 0.991, Q2 (cum): 0.98 (K) and permutation testing of the OPLS-DA 6 (L).
