# Supplementary material for: Characterization of the Key Aroma Compounds in Different Aroma Types of Chinese Yellow Tea
Source: MDPI journal article supplement (doi:10.3390/foods12010027), 2022-12-21
Supplement: s1 [file s1]

**Table S1: The main volatile compounds in different raw material or processing parameters of yellow tea**

| Raw material<br>/processing parameters | Types                                  | Compounds                                                                                                                                                                                                                                                                                                                                                                  | Reference |
|----------------------------------------|----------------------------------------|----------------------------------------------------------------------------------------------------------------------------------------------------------------------------------------------------------------------------------------------------------------------------------------------------------------------------------------------------------------------------|-----------|
| Different raw material                 | Bud-leaf yellow tea                    | benzeneacetaldehyde                                                                                                                                                                                                                                                                                                                                                        | Ref 1     |
|                                        | Bud-leaf yellow tea                    | ethyl hexanoate, benzyl alcohol, geraniol, phenylethyl alcohol, citral, neral, myrcene                                                                                                                                                                                                                                                                                     |           |
|                                        | Multi-leaf yellow tea                  | 1-methylpyrrole-2-carboxaldehyde, 3-ethyl-2,5-dimethylpyrazine, 2-ethyl-5-methylpyrazine, 2,3-diethyl-5-methylpyrazine                                                                                                                                                                                                                                                     |           |
|                                        | Mengdinghuangya<br>(bud yellow tea)    | 2-methyl-butanal, 1-Ethylpyrrole-2-carboxaldehyde, (E)-linalool oxide (furanoid), Methyl salicylate                                                                                                                                                                                                                                                                        | Ref 2     |
|                                        | Pingyanghuangtang<br>(bud yellow tea)  | (Z)-3-hexen-1-ol, styrene, (E)-2-heptenal, Benzaldehyde, 1-octen-3-ol, (E,E)-2,4-heptadienal, (E,E)-3,5-octadien-2-one, (Z)-linalool oxide (furanoid), (E,Z)-3,5-octadien-2-one, Linalool, Naphthalene, Indole, $\alpha$ -ionone, geranyl acetone, trans- $\beta$ -ionone, dihydroactinidiolide                                                                            |           |
|                                        | Weishanhuangcha<br>(little yellow tea) | phenylethyl alcohol, geraniol, biphenyl, (Z)-jasmone, coumarin                                                                                                                                                                                                                                                                                                             |           |
| Different roasting degree              | Small fire<br>(120~130°C, 30 min)      | 4-(2,6,6-trimethylcyclohexa-1,3-dienyl)but-3-en-2-one, 2,4,5-trimethyloxazole, trans- $\beta$ -ocimene, 2-ethyl-3,5-dimethylpyrazine, 2,5-diethylpyrazine, linalool, 2,6-dimethyl-2,4,6-octatriene, 2,3-diethyl-5-methylpyrazine, 3,5-diethyl-2-methylpyrazine, trans- $\beta$ -ionone                                                                                     | Ref 3     |
|                                        | Medium fire<br>(130~140°C, 3.5 h)      | trans-calamenene, 1-methyl-4-(1-methylethylidene)cyclohexene, 2,4,5-trimethyloxazole, 3-ethyl-2,4-dimethyl-1H-pyrrole, trans- $\beta$ -ocimene, 2-ethyl-3,5-dimethylpyrazine, linalool, 2,6-dimethyl-2,4,6-octatriene, (E,Z)-2,6-dimethyl-2,4,6-octatriene, 2,3-diethyl-5-methylpyrazine, 3,5-diethyl-2-methylpyrazine, trans- $\beta$ -ionone, trans-calamenene           |           |
|                                        | Old fire<br>(145~155°C, 3.5 h)         | cadala-1(10),3,8-triene, 1,7-dimethyl-naphthalene, 2,4,5-trimethyloxazole, 3-ethyl-2,4-dimethyl-1H-pyrrole, trans- $\beta$ -ocimene, 2-ethyl-3,5-dimethylpyrazine, 2,5-diethylpyrazine, linalool, 2,6-dimethyl-2,4,6-octatriene, (E,Z)-2,6-dimethyl-2,4,6-octatriene, 2,3-diethyl-5-methylpyrazine, 3,5-diethyl-2-methylpyrazine, trans- $\beta$ -ionone, trans-calamenene |           |

1. Jiang R.G.; Huang Y.; Jin Y.L.; Huang F.F.; Liu Z.H.; Huang J.A.; Li Q. Analysis of Characteristic Aroma Components of Different 399 Grades of Yellow Tea. Food Sci. 2021, 42, 89-98.
2. Shi Y.L.; Wang M.Q.; Dong Z.B.; Zhu Y.; Shi J.; Ma W.J.; Lin Z., Lv H.P. Volatile components and key odorants of Chinese yellow tea (*Camellia sinensis*). LWT-Food Sci Technol. 2021, 146, 111512.
3. Guo X.; Ho C. T.; Schwab W., Wan X. Effect of the roasting degree on flavor quality of large-leaf yellow tea. Food Chem. 2021, 347, 129016.
