# Supplementary material for: Characterization of the Key Aroma Compounds in Different Aroma Types of Chinese Yellow Tea
Source: MDPI journal article supplement (doi:10.3390/foods12010027), 2022-12-21
Supplement: s1 [file s1]

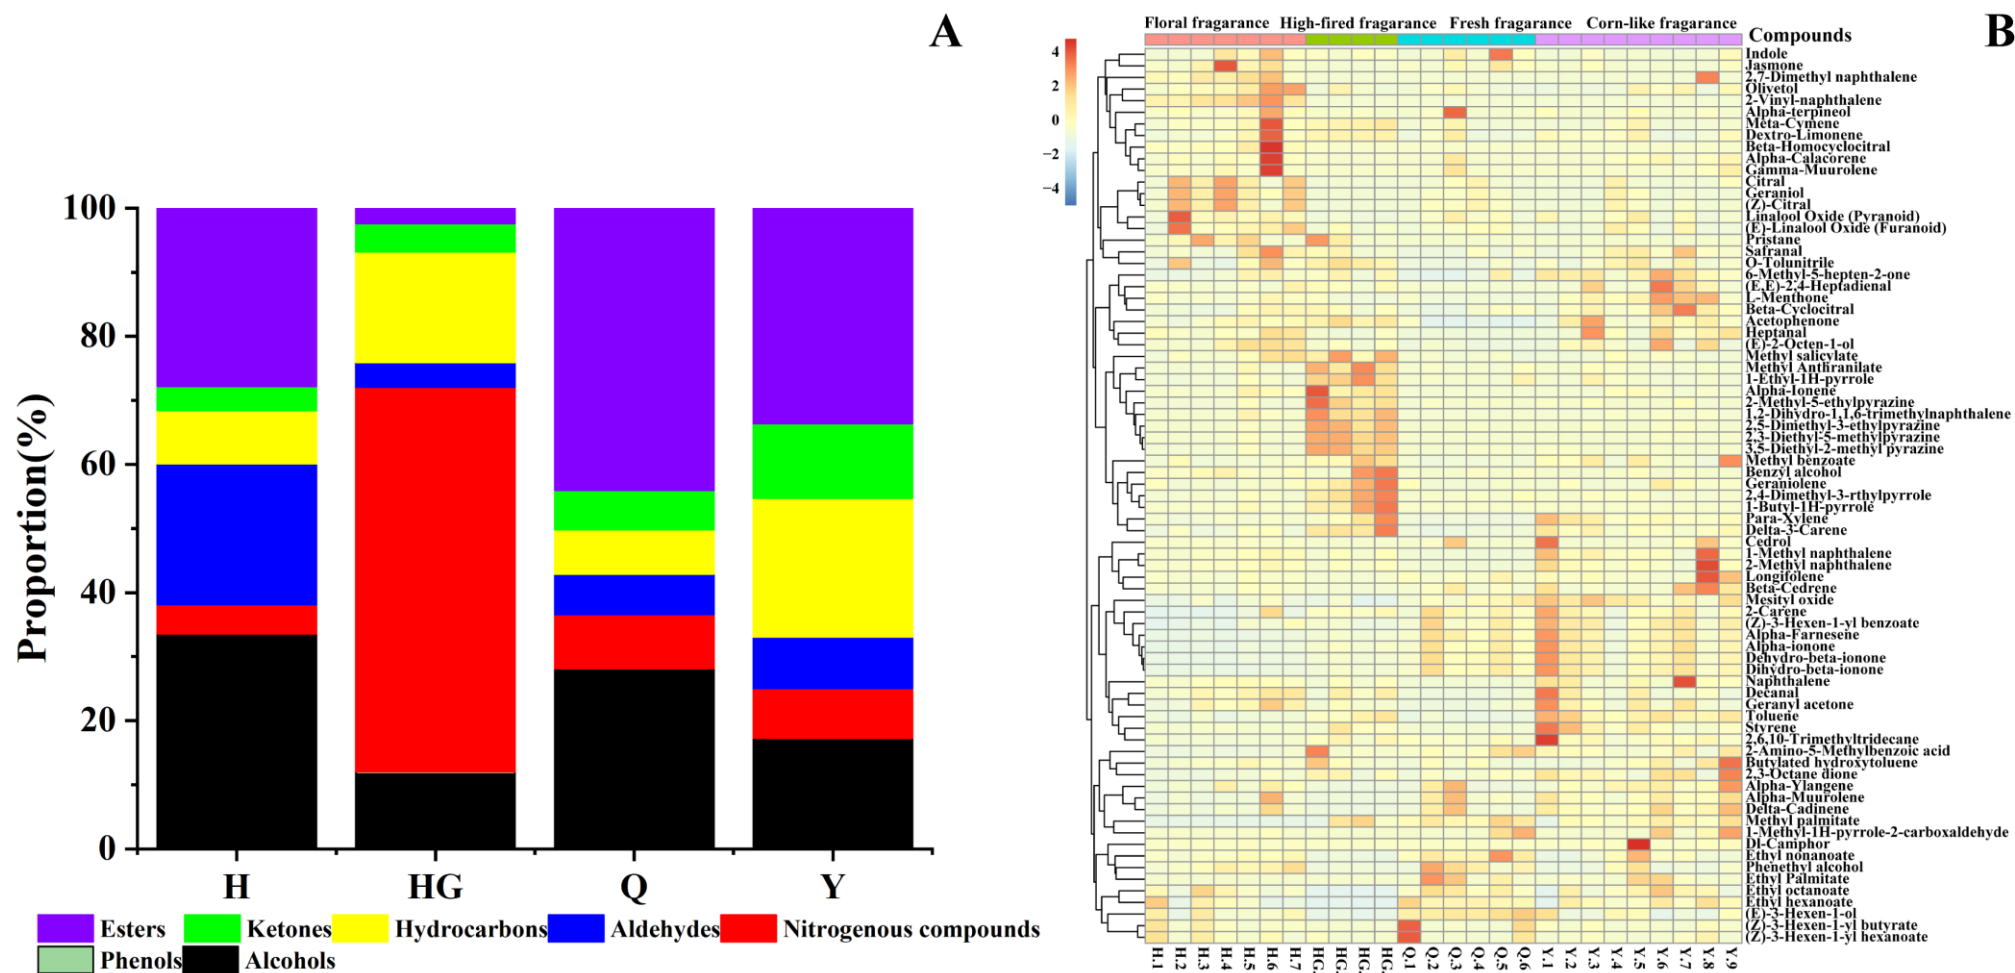

**Figure S1.** Differences of the volatile categories (A) and discriminatory volatiles (B) among the four aroma types of yellow tea.
