# Supplementary material for: Characterization of the Key Aroma Compounds in Different Aroma Types of Chinese Yellow Tea
Source: Foods. 2022 Dec 21;12(1):27. doi: 10.3390/foods12010027 (PMC9818532; doi:10.3390/foods12010027)
Supplement: Supplementary file 1 [file foods-12-00027-s001.zip]

Archive with 9 entries (8 files):
- supplementary file - revised for final 12.03/
- supplementary file - revised for final 12.03/Figure S1.pdf
- supplementary file - revised for final 12.03/Figure S2.pdf
- supplementary file - revised for final 12.03/Figure S3.pdf
- supplementary file - revised for final 12.03/Supplement material S1.pdf
- supplementary file - revised for final 12.03/Table S1.pdf
- supplementary file - revised for final 12.03/Table S2.xlsx
- supplementary file - revised for final 12.03/Table S3.xlsx
- supplementary file - revised for final 12.03/Table S4.xlsx
