# Supplementary material for: Characterization of the Key Aroma Compounds in Different Aroma Types of Chinese Yellow Tea
Source: Foods. 2022 Dec 21;12(1):27. doi: 10.3390/foods12010027 (PMC9818532; doi:10.3390/foods12010027)
Supplement: Supplementary file 1 [file foods-12-00027-s001.zip › supplementary file - revised for final 12.03/Table S2.xlsx]

## Sheet: Sheet1
Supplementary Table S2: Yellow tea samples information
Sample NO.	Material tenderness	Province	Sample ID	Typical aroma types
S01	One Bud	Hunan	/	/
S02	One Bud	Hunan	/	/
S03	One Bud	Zhejiang	/	/
S04	One Bud	Zhejiang	Q1	"Fesh fragarance type"
S05	One Bud	Hunan	/	/
S06	One Bud	Hunan	/	/
S07	One Bud	Hunan	/	/
S08	One Bud	Hunan	/	/
S09	One Bud	Hunan	/	/
S10	One Bud	Hunan	/	/
S11	One Bud	Hunan	Q2	"Fesh fragarance type"
S12	One Bud	Sichuan	H7	"Floral fragrance type"
S13	One Bud	Zhejiang	/	/
S14	One Bud	Zhejiang	/	/
S15	One Bud	Sichuan	Y1	"Corn-like fragrancetype"
S16	One Bud	Hunan	/	/
S17	One Bud	Hunan	H1	"Floral fragrance type"
S18	One Bud	Anhui	/	/
S19	One Bud	Sichuan	/	/
S20	One Bud	Zhejiang	/	/
S21	One Bud	Zhejiang	/	/
S22	One Bud	Anhui	/	/
S23	A bud with a leave	Guizhou	/	/
S24	A bud with a leave	Guangdong	/	/
S25	A bud with a leave	Hunan	/	/
S26	A bud with a leave	Hunan	/	/
S27	A bud with a leave	Hunan	/	/
S28	A bud with a leave	Guangdong	H2	"Floral fragrance type"
S29	A bud with a leave	Zhejiang	/	/
S30	A bud with a leave	Zhejiang	Y2	"Corn-like fragrancetype"
S31	A bud with a leave	Anhui	/	/
S32	A bud with a leave	Hunan	/	/
S33	A bud with a leave	Hubei	/	/
S34	A bud with a leave	Hunan	/	/
S35	A bud with a leave	Hunan	/	/
S36	A bud with a leave	Hunan	Q3	"Fesh fragarance type"
S37	A bud with a leave	Hunan	/	/
S38	A bud with a leave	Zhejiang	/	/
S39	A bud with a leave	Zhejiang	H3	"Floral fragrance type"
S40	A bud with a leave	Hunan	/	/
S41	A bud with a leave	Hunan	/	/
S42	A bud with a leave	Hunan	/	/
S43	A bud with a leave	Hunan	H4	"Floral fragrance type"
S44	A bud with a leave	Hunan	/	/
S45	A bud with a leave	Hunan	/	/
S46	A bud with a leave	Zhejiang	/	/
S47	A bud with a leave	Zhejiang	/	/
S48	A bud with a leave	Hunan	/	/
S49	A bud with a leave	Anhui	/	/
S50	A bud with a leave	Anhui	Q4	"Fesh fragarance type"
S51	A bud with a leave	Sichuan	H5	"Floral fragrance type"
S52	A bud with a leave	Hunan	/	/
S53	A bud with a leave	Zhejiang	/	/
S54	A bud with a leave	Zhejiang	Q5	"Fesh fragarance type"
S55	A bud with a leave	Zhejiang	Y3	"Corn-like fragrancetype"
S56	A bud with a leave	Hunan	/	/
S57	A bud with a leave	Zhejiang	/	/
S58	A bud with a leave	Hunan	/	/
S59	A bud with a leave	Guangdong	/	/
S60	A bud with a leave	Hunan	/	/
S61	A bud with a leave	Hunan	/	/
S62	A bud with a leave	Hunan	H6	"Floral fragrance type"
S63	A bud with a leave	Hunan	Y4	"Corn-like fragrancetype"
S64	A bud with a leave	Hunan	/	/
S65	A bud with a leave	Sichuan	/	/
S66	A bud with a leave	Hunan	Q6	"Fesh fragarance type"
S67	A bud with one or two or three leaves	Guizhou	/	/
S68	A bud with four or five leaves	Hunan	/	/
S69	A bud with four or five leaves	Zhejiang	/	/
S70	A bud with four or five leaves	Anhui	HG1	"Roasted fragrance type"
S71	A bud with four or five leaves	Guangdong	HG2	"Roasted fragrance type"
S72	A bud with four or five leaves	Zhejiang	HG3	"Roasted fragrance type"
S73	A bud with one or two or three leaves	Hunan	/	/
S74	A bud with one or two or three leaves	Zhejiang	/	/
S75	A bud with one or two or three leaves	Zhejiang	/	/
S76	A bud with one or two or three leaves	Hunan	/	/
S77	A bud with one or two or three leaves	Zhejiang	/	/
S78	A bud with one or two or three leaves	Hunan	/	/
S79	A bud with one or two or three leaves	Hunan	/	/
S80	A bud with one or two or three leaves	Hunan	/	/
S81	A bud with one or two or three leaves	Zhejiang	/	/
S82	A bud with one or two or three leaves	Sichuan	/	/
S83	A bud with one or two or three leaves	Hunan	/	/
S84	A bud with one or two or three leaves	Hunan	/	/
S85	A bud with one or two or three leaves	Hunan	/	/
S86	One Bud	Zhejiang	Y5	"Corn-like fragrancetype"
S87	One Bud	Zhejiang	/	/
S88	A bud with one or two or three leaves	Zhejiang	Y6	"Corn-like fragrancetype"
S89	One Bud	Zhejiang	Y7	"Corn-like fragrancetype"
S90	A bud with one or two or three leaves	Guizhou	/	/
S91	A bud with one or two or three leaves	Zhejiang	Y8	"Corn-like fragrancetype"
S92	A bud with one or two or three leaves	Hunan	/	/
S93	One Bud	Hunan	/	/
S94	One Bud	Hunan	/	/
S95	A bud with one or two or three leaves	Hunan	Y9	"Corn-like fragrancetype"
S96	A bud with one or two or three leaves	Hunan	/	/
S97	A bud with four or five leaves	Hunan	HG4	"Roasted fragrance type"
