# Supplementary material for: Characterization of the Key Aroma Compounds in Different Aroma Types of Chinese Yellow Tea
Source: Foods. 2022 Dec 21;12(1):27. doi: 10.3390/foods12010027 (PMC9818532; doi:10.3390/foods12010027)
Supplement: Supplementary file 1 [file foods-12-00027-s001.zip › supplementary file - revised for final 12.03/Table S3.xlsx]

## Sheet: Sheet1
Supplementary Table S3: The standard curve of identified volatile compounds in yellow tea
Compounds	CAS	Purity (%)	Quantitative ions (m/z) a	Linear equations	R2	Linear range (μg/L)	LOD (μg/L)	LOQ (μg/L)
1-Ethyl-1H-pyrrole	617-92-5	≥98%	83，98,91，55	y=0.1101x+0.2551	0.9932	0.0281~4292.1927	0.0234769	0.0586922
(E)-3-Hexen-1-ol	928-97-2	≥99.5%	67，82，69，55	y=0.0087x+0.2039	0.9959	0.3485~11137.5765	0.000430419	0.00107605
Heptanal	111-71-7	≥95%	70，96,86，81	y=0.1006x+0.7340	0.9966	0.3138~131.4831	0.0548643	0.137161
1-Methyl-1H-pyrrole-2-carboxaldehyde	1192-58-1	≥98%	109，110，108,80	y=0.0937x+0.0611	0.9929	0.0754~437.3118	0.0440982	0.110245
Benzaldehyde	100-52-7	≥99.5%	106，105,77,51	y=0.1113x+0.4784	0.9948	2.0007~847.6766	0.148949	0.372372
1-Octen-3-ol	3391-86-4	≥98%	57，72,85,99	y=0.1292x+0.7254	0.9956	1.5447~531.5614	0.225697	0.564241
6-Methyl-5-hepten-2-one	110-93-0	≥98%	108，93,69,83	y=0.1084x+0.3061	0.993	0.0078~488.7049	0.00481919	0.012048
Myrcene	123-35-3	≥98%	93，121,81,69	y=0.1632x-0.3671	0.9992	4.1684~806.3259	0.917154	2.29289
(E,E)-2,4-Heptadienal	4313-03-5	≥85%	81，110，91，67	y=0.0428x+0.8480	0.9973	0.0148~551.4913	0.0154117	0.0385292
Delta-3-Carene	13466-78-9	≥99%	105，91，,79,120	y=0.0258x+0.0267	0.9974	0.0057~365.8619	0.00136837	0.00342093
Meta-Cymene	535-77-3	≥98%	119，134,105,91	y=0.5553x+0.8017	0.9974	0.1396~191.5462	0.00384909	0.00962273
Dextro-Limonene	5989-27-5	≥98%	93，107,121,136	y=0.0995x+0.7154	0.9988	0.0987~852.6195	0.00675839	0.016896
Benzyl alcohol	100-51-6	≥99.5%	108，107,91,79	y=0.1475x+0.8037	0.9969	0.2350~825.8170	0.0117798	0.0294495
Phenyl acetaldehyde	122-78-1	≥99.5%	91，120,92,65	y=0.0570x+0.0539	0.9949	0.2575~904.8229	0.0362098	0.0905246
2,4-Dimethyl-3-rthylpyrrole	517-22-6	≥98%	123，108,106,94	y=0.1761x+0.1010	0.9927	0.8365~1120.0023	0.43028	1.0757
Acetophenone	98-86-2	≥99%	105，120,77,106	y=0.0276x+0.2894	0.9978	0.0013~588.5553	9.00797e-05	0.000225199
Methyl benzoate	93-58-3	≥99.5%	105，136,106,77	y=0.2475x+0.0173	0.9981	0.0159~18.0099	0.000752323	0.00188081
Linalool	78-70-6	≥98%	93，121，71,136	y=0.1975x-0.4031	0.9976	3.5125~1090.5075	0.753821	1.88455
Phenethyl alcohol	60-12-8	≥99%	91，122,92,65	y=0.1017x+0.3157	0.9991	0.0064~863.3610	0.000832094	0.00208024
Dl-Camphor	76-22-2	≥99%	95，108,152,81	y=0.0816x+0.0714	0.9957	0.0836~37.9938	0.0164803	0.0412009
L-Menthone	14073-97-3	≥99%	97，111，125,83	y=0.0060x+0.0507	0.999	0.4553~398.8715	0.147587	0.368968
2,3-Diethyl-5-methylpyrazine	18138-04-0	≥98%	150，135,149,121	y=0.0816x+0.0013	0.9964	0.0004~72.9151	0.000152349	0.000380873
Benzyl Acetate	140-11-4	≥98%	108，150,91,79	y=0.1198x+0.0591	0.9929	0.0050~46.0187	0.000521369	0.00130342
Ethyl benzoate	93-89-0	≥99%	105，122,150,77	y=0.2874x+0.0132	0.9974	0.0022~3.5556	0.000665711	0.00166428
4-terpinenol	562-74-3	≥99%	71，111，154，93	y=0.0460x+0.0081	0.9971	0.0157~126.0983	0.00402628	0.0100657
Naphthalene	91-20-3	≥98%	128，102,129,77	y=0.0511x+1.0933	0.9907	0.0459~667.1251	0.0026109	0.00652724
(Z)-3-Hexen-1-yl butyrate	16491-36-4	≥98%	67，82，71，55	y=0.1686x+0.0085	0.9984	0.0013~65.9362	0.000302813	0.000757033
Alpha-terpineol	98-55-5	≥98%	93，121,136,81	y=0.0219x+0.0892	0.9997	0.0050~879.7280	0.000950955	0.00237739
Methyl salicylate	119-36-8	≥99%	120，152,121,92	y=0.1403x+0.0168	0.9996	0.2668~366.3841	0.00190221	0.00475554
Ethyl octanoate	106-32-1	≥99%	88，101,127,89	y=0.1317x+0.0214	0.9951	0.0328~36.9408	0.00815964	0.0203991
Decanal	112-31-2	≥97%	57，112,96,128	y=0.0220x+0.0619	0.9906	0.1858~215.6870	0.00971921	0.024298
Beta-Cyclocitral	432-25-7	≥95%	137，152,123,109	y=0.0495x+0.1071	0.9984	0.4756~282.8106	0.0614938	0.153734
Linalyl acetate	115-95-7	≥95%	93，121,136,107	y=0.0297x+0.0154	0.9912	0.0005~1003.1887	0.00014961	0.000374025
(Z)-3-Hexen-1-yl isovalerate	35154-45-1	≥99%	82，67,85,57	y=0.1271x+0.0173	0.9961	0.0044~52.7540	0.000797879	0.0019947
Geraniol	106-24-1	≥97%	69，93,123,84	y=0.2586x+0.0707	0.9982	0.0153~980.5421	0.00698678	0.0174669
2-Methyl naphthalene	91-57-6	≥99%	142，141，115，89	y=0.2043x+0.0956	0.9938	0.0075~18.1561	0.00248507	0.00621268
Indole	120-72-9	≥99%	117，90，142,141	y=0.0373x+0.0025	0.9949	0.0021~1127.6128	0.000828319	0.0020708
1-Methyl naphthalene	90-12-0	≥99%	142，141，115,71	y=0.3522x+0.0601	0.9979	0.0162~6.7380	0.00229855	0.00574637
Methyl Anthranilate	134-20-3	≥99%	119，151,120,92	y=0.0057x+0.0431	0.9918	0.0140~55.4355	0.00477738	0.0119435
(Z)-3-Hexen-1-yl hexanoate	31501-11-8	≥99%	82，99,83,71	y=0.0684x+0.0171	0.993	0.0139~266.7881	0.00152158	0.00380396
Jasmone	488-10-8	≥95%	164，149,135,122	y=0.0362x+0.0261	0.9919	0.0779~1065.5898	0.00224084	0.0056021
Alpha-Ionone	127-41-3	≥99.5%	121，136,109,93	y=0.0419x-0.4046	0.9987	8.0059~123.5982	1.98242	4.95606
Geranyl acetone	3796-70-1	≥99%	43，151,136,69	y=0.0166x+0.0125	0.9945	0.6506~317.8554	0.00210799	0.00526998
Butylated hydroxytoluene	128-37-0	≥98%	205，220,177,145	y=0.0544x+0.0852	0.9961	0.0049~83.3368	0.00167123	0.00417807
Olivetol	500-66-3	≥95%	124，180,137,123	y=0.0145x+0.0712	0.9945	0.2899~681.6035	0.043118	0.107795
Nerolidol	7212-44-4	≥99%	69，107,93,136	y=0.0086x+0.0022	0.9955	0.0093~302.4924	0.000414571	0.00103643
(Z)-3-Hexen-1-yl benzoate	25152-85-6	≥98%	105，82,123，67,	y=0.0133x-0.0165	0.9994	0.9925~38.4797	0.264901	0.662251
Cedrol	77-53-2	≥99%	95，151,135,119	y=0.0034x+0.0176	0.994	0.0108~247.5461	0.00150426	0.00376066
Methyl palmitate	112-39-0	≥97%	74，87,143,227	y=0.0005x+0.0003	0.9917	0.0821~88.9439	0.00632049	0.0158012
Ethyl Palmitate	628-97-7	≥97%	88，101,157,239	y=0.0005x+0.0002	0.9905	0.0520~49.2542	0.0187061	0.0467653
a Ions monitored for quantitation. The underlined ions were the quantified ones while the others were the identified ones.
