# Supplementary material for: Characterization of the Key Aroma Compounds in Different Aroma Types of Chinese Yellow Tea
Source: Foods. 2022 Dec 21;12(1):27. doi: 10.3390/foods12010027 (PMC9818532; doi:10.3390/foods12010027)
Supplement: Supplementary file 1 [file foods-12-00027-s001.zip › supplementary file - revised for final 12.03/Table S4.xlsx]

## Sheet: Sheet1
Supplementary Table S4. The OAV values of the volatile compounds indentified in Yellow tea.
Compounds	CAS	Odour Threshold in water (μg/L)	References	Aroma Quality	References	H1	H2	H3	H4	H5	H6	H7	H	HG1	HG2	HG3	HG4	HG	Q1	Q2	Q3	Q4	Q5	Q6	Q	Y1	Y2	Y3	Y4	Y5	Y6	Y7	Y8	Y9	Y
ethyl hexanoate	123-66-0	0.01	[1]	fruity	[4]	314035	314035	1.6476e+06	3.91332e+06	1.68355e+06	195904	152183	1.17438e+06	5987.01	7966.88	4789.27	7921.18	6666.08	291863	45530.2	109783	108014	55984.2	99402.5	118430	0	67273.1	65345	190457	69851.6	104978	35611.9	261449	72127.2	96343.6
linalool	78-70-6	0.01	[1]	floral	[4]	49906.5	49906.5	9745.29	72206.3	73348.3	90875.6	25400.4	53055.6	2586.4	2177.89	1843.47	2065.13	2168.22	3922.12	2881.45	4572.29	3296.1	2206.09	1736.88	3102.49	439.06	1155.72	1220.99	7263.33	5651.16	1299.98	1507.3	1303.04	2975.3	2535.1
beta-ionone	79-77-6	0.007	[1]	floral	[4]	26283.8	26283.8	11911.9	30551.2	96323.8	50532.8	33471.8	39337	8743.28	6690.32	4711.74	5912.76	6514.52	2854.59	1721.59	1783.96	2243.32	2195.01	2400.31	2199.8	1758.7	2100.32	2360.96	3477.71	4276.2	3852.53	4083.13	4240.59	2073.19	3135.93
1-octen-3-ol	3391-86-4	0.005	[1]	mushroom	[2]	13222	13222	15091.9	79828.1	88593.6	36228.8	14542.7	37247	2362.47	2987.41	532.304	2871.8	2188.5	1627.57	3150.64	1360.15	988.019	1207.97	1578.5	1652.14	1571.2	2736.42	4177.55	4152.36	1184.29	10635.3	1702.63	2431.14	386.173	3219.68
citral	5392-40-5	0.5	[1]	citrus	[4]	29201.3	29201.3	6192.08	49158.7	13494.8	203.901	5118.38	18938.6	7.45256	9.10623	6.72589	8.22408	7.87719	5.81697	5.28436	202.511	364.915	6.0078	3.12792	97.9439	3.81422	1.5456	2.59497	1302.28	12.5877	2.47214	3.06719	4.57591	137.805	163.416
phenethyl alcohol	60-12-8	0.015	[1]	floral	[14]	11086.1	11086.1	9607.68	47965.7	24016.8	13212.4	10161.7	18162.4	286.582	353.678	398.093	232.864	317.804	153.363	997.498	1760.79	1101.62	207.147	953.486	862.318	0	0	57.4853	2226.46	1500.1	36.7114	119.366	71.6565	283.15	477.214
(E,E)-2,4-heptadienal	4313-03-5	0.032	[11]	fatty	[4]	10053.3	10053.3	1278.19	30.1548	8956.1	300.662	8549.65	5603.05	2284.79	941.994	0	2243.96	1367.69	151.352	0	0	0	0	0	25.2253	0	25.8238	1991.27	174.029	134.266	3662.52	1401.6	1834.47	0	1024.89
phenyl acetaldehyde	122-78-1	0.3	[1]	green	[4]	2513.4	2513.4	784.051	210.734	2175.43	316.171	383.124	1270.9	366.638	268.988	196.227	163.812	248.916	91.8997	17.745	3.23551	154.633	30.4537	31.2764	54.8739	47.1675	19.6386	36.3916	1134.74	148.247	9.66582	59.7786	18.6848	42.3347	168.516
alpha-Muurolene	10208-80-7	0.1	[3]	woody	[4]	1069.34	1069.34	179.835	1042.85	682.218	3461.45	202.245	1101.04	47.52	34.8779	26.9754	30.3505	34.9309	41.7892	59.1476	241.253	39.0696	36.4045	34.6081	75.3786	44.1886	45.647	51.1608	116.358	74.1519	103.277	38.3502	122.259	141.58	81.8858
decanal	112-31-2	0.1	[1]	floral	[13]	622.563	622.563	758.916	1339.54	1797.39	1185.34	522.853	978.452	20.2763	116.086	72.0424	161.254	92.4148	10.9117	0	0	0	0.411967	11.8134	3.85617	52.2366	39.7346	17.0091	16.9911	66.677	4.64305	9.45357	48.9549	2.33565	28.6706
naphthalene	91-20-3	0.44	[5]	pungent	[4]	188.422	188.422	272.091	1263.49	951.989	350.16	105.344	474.274	0.518747	40.0527	12.8869	50.9239	26.0956	0	0	0	0	0	0	0	20.2203	29.6256	3.48653	26.8806	32.6171	5.48916	84.2457	37.4176	15.0387	28.3357
methyl anthranilate	134-20-3	3	[1]	fruity	[4]	18.3376	18.3376	78.4278	72.7153	1997.94	161.814	10.8191	336.913	659.904	207.497	703.29	365.866	484.139	9.93664	8.66019	4.00257	12.1964	1.74093	35.9328	12.0782	2.05708	4.238	31.3244	110.722	11.3433	3.75126	0.54391	28.0012	3.65555	21.7374
geraniol	106-24-1	1	[1]	floral	[4]	485.071	485.071	102.7	817.118	224.13	56.8807	84.8433	322.259	1.69169	1.64214	1.27426	1.26917	1.46932	1.33513	1.17901	2.82942	5.80292	1.33992	0.434296	2.15345	0.148871	0.178144	0.0665214	22.672	3.66277	0.228312	0.672024	0.0428429	0.642857	3.14603
myrcene	123-35-3	1.2	[1]	spicy	[4]	311.972	311.972	85.6773	559.949	416.414	450.19	85.2392	317.345	32.4489	22.3603	24.5071	26.5825	26.4747	9.77811	9.82014	14.2791	11.9291	7.21626	7.45936	10.0804	4.3421	5.60798	6.83453	44.8027	23.6101	5.62942	6.3287	7.11818	15.0912	13.2628
(Z)-citral	106-26-3	30	[1]	citrus	[4]	485.332	485.332	103.073	820.095	224.666	9.17722	84.9832	316.094	0.0990723	0.164795	0.0804721	0.121967	0.116577	0.0838351	1.44788	3.10238	6.56662	1.60854	0.0370443	2.14105	0.0481628	0.0255056	0.0320613	20.2363	2.47085	0.0320496	1.04695	0.0454942	0.914083	2.76128
dehydro-beta-ionone	1203-08-3	0.09	[6]	floral	[6]	129.709	129.709	107.292	131.866	922.03	152.268	122.155	242.147	134.887	117.287	112.323	112.756	119.313	108.723	107.906	107.292	108.69	108.562	108.596	108.295	107.292	108.005	108.445	111.038	109.323	108.433	108.9	109.897	108.079	108.824
2,5-dimethyl-3-ethylpyrazine	13360-65-1	0.4	[1]	roasted	[9]	7.24644	7.24644	16.2427	14.0739	1196.9	1.66427	11.2127	179.226	1153.46	608.353	554.23	798.492	778.634	15.642	2.72093	1.13979	16.0123	1.68957	0	6.20077	0	5.37412	17.1813	16.2889	1.09736	23.128	21.266	12.4552	0	10.7546
benzaldehyde	100-52-7	3	[5]	fruity	[4]	180.042	180.042	111.77	218.108	235.466	124.542	69.9025	159.982	35.0496	27.7796	25.1697	32.1223	30.0303	17.982	3.92167	5.14045	14.2493	5.8446	8.2231	9.22687	6.60286	8.3952	15.1454	55.7785	12.053	13.6439	13.1302	14.9286	10.1621	16.6489
1-methyl naphthalene	90-12-0	0.02	[5]	pungent	[5]	113.433	113.433	99.4728	279.705	280.752	165.556	61.5712	159.132	6.92905	15.6132	9.65325	21.0631	13.3147	2.82959	0	1.27638	0.469339	0	0.221588	0.799482	9.55934	5.3328	10.6611	22.7278	8.28349	5.70502	0.560305	81.3321	5.12625	16.5876
cedrol	77-53-2	0.5	[5]	woody	[4]	81.3074	81.3074	124.943	214.104	412.577	150.1	44.1809	158.36	0	0	0	0	0	1.59072	3.94103	118.537	0	0	1.23415	20.8837	54.1744	0.293872	0.0534178	1.83403	1.67352	0.792808	10.5185	191.579	7.67248	29.8435
(E)-linalool oxide (furanoid)	34995-77-2	60	[1]	floral	[4]	292.584	292.584	22.3464	99.4333	83.319	48.7217	37.9587	125.278	1.83293	3.84864	1.68229	2.88347	2.56183	0.58406	0.495337	1.3557	2.06622	1.29465	0.780799	1.09613	0.0903377	0.213085	0.372403	11.8201	2.25486	0.187319	1.41559	0.145734	0.272185	1.86351
ethyl octanoate	106-32-1	0.1	[7]	waxy	[4]	50.3893	50.3893	161.923	307.84	119.192	31.6308	25.1562	106.646	0	0	0	0	0	6.06173	4.73824	9.4005	4.71908	4.7976	4.35617	5.67889	0	4.11733	1.58881	13.7676	7.02278	9.72514	3.40124	10.3238	1.03562	5.6647
3,5-diethyl-2-methylpyrazine	18138-05-1	0.26	[3]	roasted	[9]	0	0	0	0	661.7	3.04366	0	94.9634	444.724	246.34	271.769	279.164	310.499	0.58139	0.959508	0	5.47513	3.27215	0	1.7147	3.73402	5.23441	0.544403	6.55544	7.89412	6.19525	0.687766	3.54508	5.8503	4.4712
alpha-ionone	127-41-3	0.4	[1][7]	floral	[4]	59.5602	59.5602	38.4261	61.3988	257.496	81.4672	54.842	87.5358	45.671	36.2535	32.9766	40.5191	38.8551	26.7806	25.0185	25.2091	25.722	26.4361	26.7603	25.9878	25.0492	25.7388	26.8302	28.3687	28.5251	27.6288	28.7687	28.3398	26.1479	27.2664
2,3-diethyl-5-methylpyrazine	18138-04-0	0.09	[1]	musty	[4]	0	0	0	0	482.784	3.49772	0	69.4689	344.571	196.33	215.059	235.547	247.877	2.62155	0.705342	0	2.66333	0.223164	0	1.03556	0	0	1.98892	3.96186	0	5.19911	2.47043	2.57292	2.77152	2.1072
(Z)-linalool oxide (furanoid)	5989-33-3	100	[2]	floral	[13]	173.311	173.311	6.80448	36.4806	40.1825	35.3282	10.9728	68.0558	1.57421	1.99507	1.07732	2.04772	1.67358	0.319825	0.233209	0.642943	0.866727	0.599355	0.475237	0.522883	0.0816051	0.160131	0.306827	6.37708	1.08844	0.205167	0.78183	0.146307	0.153276	1.03341
alpha-terpineol	98-55-5	4.6	[1]	minty	[12]	40.1648	40.1648	7.55954	33.9533	79.0522	159.371	13.5608	53.4038	1.3824	0.954298	2.22528	0.506371	1.26709	0	0.382249	16.0747	0	0	0.373597	2.80509	0.443754	0	0	1.21182	2.17305	0	0	1.79221	0.0587229	0.631062
toluene	108-88-3	24	[1]	sweet	[4]	38.4875	38.4875	58.1993	51.5839	77.8153	42.6367	19.2384	46.6355	15.5972	9.34782	23.798	28.3986	19.2854	1.71251	1.54499	1.41032	1.04825	0.739627	1.56496	1.33677	5.09802	8.47282	5.52704	20.7174	8.92583	9.70922	4.46858	13.7917	9.19252	9.5448
delta-cadinene	483-76-1	1.5	[6]	herbal	[4]	32.4754	32.4754	5.65809	70.2631	23.7226	111.244	8.43909	40.6111	1.20863	0.664195	0.255797	0.370701	0.62483	0.834743	2.28916	9.90694	0.910275	0.622431	0.577304	2.52348	1.60476	1.70971	1.54837	7.21874	2.76993	6.21402	1.20423	6.50074	7.50047	4.03011
styrene	100-42-5	3.6	[1]	floral	[14]	20.1908	20.1908	37.8932	101.952	49.3674	29.0319	12.0812	38.6724	3.35418	24.6548	12.2932	10.2322	12.6336	1.16947	0	0.828954	0.911054	0.0882259	0.795693	0.632233	9.18822	12.5336	7.45785	11.7812	12.2263	3.76358	0.512801	2.74745	3.04826	7.0288
beta-cyclocitral	432-25-7	3	[1]	sweet	[9]	28.0543	28.0543	7.90513	34.4288	78.5585	46.4085	19.5586	34.7097	9.33201	4.4224	2.74624	5.46436	5.49125	1.5121	0.198186	0.412848	1.45902	1.22917	2.06156	1.14548	0.245547	1.20294	2.31995	5.46721	2.06828	4.83755	4.40727	6.48282	1.94109	3.21918
(E)-3-hexen-1-ol	928-97-2	110	[1]	green	[4]	7.50025	7.50025	57.7183	64.7993	47.5369	23.3414	18.935	32.4759	1.04426	1.18771	0.295945	0.929776	0.864423	5.86147	1.68365	4.5387	4.09782	2.99284	6.22871	4.23386	1.45232	0.485488	0.635065	9.38965	2.68769	0.0771056	0.554489	0.87368	1.87785	2.0037
(E)-beta-ocimene	3779-61-1	34	[1]	floral	[13]	16.2619	16.2619	6.90432	33.3871	44.1978	95.1624	6.02924	31.1721	1.1252	3.19419	4.44215	4.49738	3.31473	0.856777	0.996092	2.70149	0.749761	0.748241	0.967565	1.16999	0.986019	1.0754	1.20894	3.31136	2.28696	0.644306	0.528288	1.34718	1.64983	1.4487
safranal	116-26-7	3	[6]	sweet	[9]	18.9099	18.9099	4.07842	14.0852	82.1987	68.0766	10.2814	30.9343	3.95283	2.83818	0.656256	1.11639	2.14091	0.0715846	0	0	1.01697	0	0.652322	0.290147	0	0.170159	0.458383	5.78569	2.16112	0.587475	1.8078	1.42636	0.500881	1.4331
dextro-limonene	5989-27-5	10	[2]	citrus	[4]	14.8633	14.8633	6.34371	33.1802	44.1517	71.0516	5.41575	27.1242	4.31927	2.55382	3.83408	3.86076	3.64198	0.170347	0.307391	2.03816	0.0573676	0.0601237	0.27844	0.485304	0.334994	0.387467	0.541833	2.6571	1.61746	0	0	0.663705	0.96586	0.796491
jasmone	488-10-8	7	[6]	floral	[4]	1.3908	1.3908	9.17916	126.856	17.7146	17.0678	0.700656	24.9	0.126869	0.0216041	0	0	0.0371182	0.247967	0	0.540471	0.0402675	0.603727	0.276542	0.284829	0.0333368	0.0335675	0.25331	0.126793	0	0.0297321	0	0.0558217	0.182877	0.0794931
Hotrienol	29957-43-5	110	[2][5][6]	fresh	[6]	15.1812	15.1812	1.63774	9.63951	48.9241	73.6378	1.74019	23.7059	2.25162	2.43781	0.648835	0.76114	1.52485	0.166152	0.140472	0.463029	0.0789658	0.202346	0.246855	0.216303	0.0441887	0.0696752	0.211192	0.265793	0.818071	0.0996209	0.174066	0.146812	0.0868057	0.212914
heptanal	111-71-7	3	[1]	green	[4]	15.6017	15.6017	5.06195	35.014	16.8631	36.5231	13.5407	19.7437	1.15139	0	0	1.44716	0.649638	0	0	0	0	0	0	0	0	0.130238	3.02809	2.68738	0	2.12838	0.370406	2.37123	1.79715	1.39032
2-methyl-5-ethylpyrazine	13360-64-0	16	[6]	roasted	[9]	2.08462	2.08462	2.23164	1.64553	114.22	2.27402	1.42849	17.9955	74.1689	24.2911	22.9107	28.5852	37.489	0.726064	0.835746	0.676275	1.62361	0.83254	0.828969	0.920533	0.60352	0.6425	2.22978	2.62159	0.937649	0.808805	1.74455	0.693525	0.761208	1.22702
geranyl acetone	3796-70-1	10	[7]	fruity	[14]	7.62485	7.62485	12.0518	26.4879	23.1401	23.018	5.63869	15.0837	0.933091	1.20565	1.0674	0.928244	1.0336	0.355854	0.0813188	0.228557	0.205989	0.217036	0.404328	0.248847	0.627564	0.50579	0.446378	0.803202	1.10717	0.305831	0.656626	0.541012	0.224283	0.579762
methyl benzoate	93-58-3	0.52	[1]	herbal	[13]	28.862	28.862	2.24553	8.86273	9.65161	5.79281	2.96179	12.4626	2.88599	1.65685	6.49555	4.87481	3.9783	0.497702	0.038211	0.172468	0.14346	0.170656	0.223746	0.207707	0.243233	0.362371	1.07646	0.344738	1.56043	0.367753	0.17345	0.0537407	2.70156	0.764859
dihydro-beta-ionone	17283-81-7	1	[1]	floral	[13]	11.1546	11.1546	10.4613	11.5096	14.9819	12.4298	11.858	11.9357	10.0221	10.0946	10.1241	10.0856	10.0816	9.77432	9.73247	9.88324	9.75747	9.7676	9.76656	9.78028	9.65632	9.77457	9.79549	9.86681	9.84474	9.85273	9.87936	9.98339	9.86776	9.83569
indole	120-72-9	21	[1]	floral	[6]	2.104	2.104	0.725426	41.6509	13.336	20.0248	1.65871	11.6577	0.710709	0.19295	0.781606	0.420419	0.526421	0.0474008	0.053855	0.762115	0.0871911	1.17211	0.366589	0.414878	0	0	0.164542	0.0303834	0.103893	0.019575	0.00772783	0.0665224	0.323539	0.0795759
benzyl acetate	140-11-4	2	[1]	floral	[4]	5.1436	5.1436	2.64016	19.1744	13.2155	10.7107	3.94973	8.56825	1.49	1.28776	1.06503	1.8842	1.43175	0.374784	0	0.462454	0.287909	0.172652	0.153431	0.241872	0.0494329	0.0655763	1.00295	0.906729	0.241418	0.383303	0.330633	0.122097	1.29516	0.488589
para-xylene	106-42-3	68.6	[8]	sweet	[9]	3.58319	3.58319	3.82783	20.6417	8.51378	6.32097	2.34859	6.97418	1.20667	1.11731	4.26844	7.43463	3.50676	0.191521	0.0372647	0.148281	0.0802419	0.011595	0.0919291	0.0934722	0.689648	0.839445	0.902303	1.5361	0.742847	0.700567	0.283067	0.812095	0.642288	0.794262
dehydro-ar-ionene	30364-38-6	2.5	[1]	woody	[6]	1.28369	1.28369	0.665732	2.10051	30.4925	5.54434	0.799196	6.02424	10.4762	3.38648	4.82617	6.6107	6.32488	0.019384	0	0	0.0127095	0	0.0361412	0.0113724	0	0	0.0076657	0.872022	0.0808489	0.226817	0.0328513	0.378641	0	0.17765
acetophenone	98-86-2	36	[1]	floral	[4]	2.84108	2.84108	2.70583	13.624	10.7611	3.44536	1.81748	5.43371	1.10558	0.976182	0.895313	1.08849	1.01639	0.327023	0	0	0.0412373	0	0.0035144	0.0619624	0.022301	0.219288	0.554009	0.557719	0.148313	0.295402	0.148171	0.653021	0.166053	0.307142
methyl salicylate	119-36-8	34.9	[1]	minty	[4]	5.71876	5.71876	1.51868	5.0371	7.29104	7.60778	3.61602	5.21545	1.12391	1.51109	0.70856	1.85594	1.29988	0.117801	0.0421109	0.0605344	0.077818	0.0750065	0.0258717	0.0665238	0.00955582	0.0190246	0.050815	0.687138	0.107719	0.128921	0.0693333	0.0600805	0.054827	0.131935
mesityl oxide	141-79-7	200	[6]	sweet	[3]	3.70328	3.70328	4.44556	3.42446	7.52864	5.1028	1.09146	4.14278	0.313207	0.522021	0.079454	0.105336	0.255004	0.40527	0.169246	0.29837	0.463452	0.308681	0.733441	0.39641	0.293851	0.396862	0.75799	2.41015	0.651428	0.252969	0.291874	0.46326	0.704052	0.691381
(E)-2-octen-1-ol	18409-17-1	20	[1]	green	[4]	1.42471	1.42471	0.442505	7.26473	8.23784	3.84099	1.47794	3.44478	0.120564	0.147567	0.0534032	0.239203	0.140184	0	0.0171313	0.0191428	0	0	0.000820209	0.00618237	0	0.0611555	0.119245	0.193086	0.0120282	0.309983	0	0.479927	0	0.130603
6-Methyl-5-hepten-2-one	110-93-0	50	[1]	citrus	[4]	1.38595	1.38595	1.15417	5.65058	8.14508	4.19513	0.8899	3.25811	0.480201	0.489055	0.230684	0.567472	0.441853	0.0691778	0.00151785	0.0182513	0.0628431	0.18089	0.0578676	0.0650913	0.101276	0.169192	0.258147	0.434968	0.275866	0.431786	0.200849	0.384859	0.142463	0.266601
2-methyl naphthalene	91-57-6	3	[1]	sweet	[4]	1.84208	1.84208	1.71051	5.04336	4.89555	3.133	1.02184	2.78406	0.135527	0.212247	0.162537	0.34071	0.212755	0.0474442	0	0.00920679	0.00433366	0	0.00152493	0.0104183	0.148252	0.108871	0.11603	0.233446	0.164494	0.0706894	0.000784042	1.81982	0.116034	0.308714
linalyl acetate	115-95-7	100	[7]	herbal	[4]	2.27812	2.27812	0.173257	0.648187	1.58426	8.35991	0.297451	2.23133	0.0904234	0.0726567	0.185629	0.0939433	0.110663	0.02085	0.00369779	0.0178841	0.0142814	0.0066194	0.00888437	0.0120362	0	0.00384812	0.0137275	0.0375884	0.0322764	0.0361841	0.00854511	0.0278436	0.0109688	0.018998
alpha-ionene	475-03-6	2	[1]	fruity	[13]	1.03902	1.03902	0.250091	0.999071	7.31523	2.17319	0.630236	1.92084	2.84574	0.361962	0.901465	0.938173	1.26184	0	0	0	0	0	0	0	0	0	0	0.357878	0.14634	0.0246928	0	0.0575832	0	0.065166
ethyl nonanoate	123-29-5	377	[1]	floral	[13]	1.24513	1.24513	0.898659	3.34146	2.74157	1.2423	0.676804	1.62729	0.0194339	0.0389587	0.0161848	0	0.0186444	0.123588	0.0706344	0.121457	0.11713	0.194642	0.159165	0.131103	0	0	0.029425	0.300177	0.272994	0.0566818	0.0452947	0.0485545	0.0223111	0.0861598
benzyl alcohol	100-51-6	100	[1]	floral	[4]	0.714318	0.714318	1.26772	6.88181	1.16938	0.210568	0.365333	1.61764	0.000995039	0.0017286	1.17476	1.27539	0.613219	0.0235737	0	0	0.047026	0	0.0291224	0.0166204	0	0	0	0.0494059	0.0542587	0	0.0125325	0	0	0.0129108
o-tolunitrile	529-19-1	200	[6]	roasted	[6]	3.45211	3.45211	0.120402	0.0924012	1.52518	1.8009	0.21887	1.52314	0.188581	0.168063	0.192756	0.133997	0.170849	0.0173378	0.00455838	0.00879529	0.0131348	0.016092	0.00774645	0.0112775	0.00948133	0.00445616	0.0210278	0.192695	0.0798905	0.0160165	0.0313571	0.0300418	0.0234445	0.045379
L-menthone	14073-97-3	170	[1]	minty	[4]	0.44806	0.44806	0.469786	0.848593	1.20176	1.41705	0.315111	0.735488	0.140873	0.0128605	0	0	0.0384335	0.0506706	0	0	0.00295427	0	8.83131e-05	0.0089522	0.00171804	0.0330679	0.0866975	0.207101	0.114661	0.246812	0.132743	0.450175	0.0260592	0.144337
(Z)-3-hexen-1-yl isovalerate	35154-45-1	20	[6]	green	[4]	0.102914	0.102914	1.37577	0.393359	0.428215	0.29753	0.0259271	0.389518	0.0335199	0.0148249	0	0.0131226	0.0153669	0.242858	0	0	0.0027843	0.00201571	0.0926554	0.056719	0	0	0.00546082	0.108116	0.0114905	0.0057867	0.0188343	0.292788	0	0.0491641
tridecane	629-50-5	42	[6]	chemical	[6]	0.184577	0.184577	0.134398	0.334233	1.00958	0.214923	0.105227	0.309645	0.296528	0.0550218	0.00178407	0.28222	0.158889	0.0799827	0.0693257	0.00645545	0.012592	0	0.00272628	0.0285137	0.00175802	0	0	0	0	0.145063	0.0526431	0.133618	0.0728515	0.0451038
delta-3-carene	13466-78-9	770	[1]	citrus	[4]	0.362769	0.362769	0.0359308	0.195055	0.395954	0.210063	0.0264633	0.227001	0.0834965	0.0516111	0.0722713	0.139604	0.0867458	0.00633249	0	0.00102815	0.00446217	0.0022339	0.00512344	0.00319669	0.00818862	0.00734596	0.0161664	0.0255452	0.0138164	0.00844358	0.00369613	0.0186733	0.0136791	0.0128394
nerolidol	7212-44-4	250	[6]	floral	[4]	0.0620036	0.0620036	0.0348078	0.163581	0.198404	1.00831	0.0511755	0.225755	0.0115042	0.00392454	0.00278711	0.00336247	0.00539458	0	0.000918679	0.0232434	0.000526247	0.00385136	0.00410283	0.00544042	0	0.000381201	0.00443223	0.00352121	0.00980387	0.00398722	0.000957086	0.00266876	0.000194497	0.0028829
4-terpinenol	562-74-3	250	[10]	sweet	[10]	0.0859889	0.0859889	0.0231653	0.182338	0.165679	0.420328	0.0258416	0.141333	0.00597824	0.00589761	0.008397	0.00296265	0.00580887	0.0103476	0.00204061	0.0093758	0.00026573	0.00119345	0.0012372	0.00407673	0.000496983	0	0.0011207	0.00465222	0.0111731	0.00114284	0.000828649	0.00483579	0.00259783	0.00298312
1-ethyl-1H-pyrrole	617-92-5	10000	[6]	roasted	[6]	0.00513154	0.00513154	0.0277542	0.0386225	0.357119	0.0771276	0.00519834	0.0737264	0.114078	0.0694641	0.154595	0.0798994	0.104509	0.0066007	0.00276925	0.00373518	0.00374275	0.00129335	0.0202726	0.0064023	0.00124528	0.00173058	0.0153411	0.0234381	0.00378781	0.00189992	0.00151643	0.00778851	0.00129033	0.00644868
meta-cymene	535-77-3	800	[1]	/	/	0.0495967	0.0495967	0.0159883	0.0746136	0.0901212	0.199527	0.0113436	0.0701125	0.0083871	0.00605439	0.00984048	0.0119965	0.00906963	0.000163261	0.000438099	0.00367438	0	0	0.000316933	0.000765446	0	0	0.000146187	0.00517315	0.003431	1.19791e-05	0	0.000930897	0.000577918	0.00114124
(Z)-3-hexen-1-yl hexanoate	31501-11-8	781	[6]	green	[4]	0.00673928	0.00673928	0.135874	0.106658	0.0137563	0.0786416	0.00114862	0.0499367	0.00966162	0.000434196	4.74061e-06	0.00129831	0.00284972	0.0499143	0	0.00068753	0	9.8468e-05	0.0124142	0.0105191	0	0.000719396	0.00188854	0.00129149	0	0.000448826	0.00122496	0.0126758	6.79444e-06	0.00202843
caffeine	58-08-2	5.5	[7]	odorless	[4]	0	0	0	0	0.282483	0	0	0.0403547	0	0	0	0	0	0	0	0	0	0	0	0	0	0	0	0	0	0	0	0	0	0
1-methyl-1H-pyrrole-2-carboxaldehyde	1192-58-1	37	[1]	roasted	[6]	0.0336417	0.0336417	0.00256234	0.0707602	0.0486713	0.0606883	0	0.0357094	0	0	0	0	0	0	0	0	0	0.0109914	0.0285428	0.00658904	0	0	0	0	0	0.0170289	0	0.013168	0.0226446	0.00587129
(Z)-3-hexen-1-yl butyrate	16491-36-4	320	[1]	green apple	[4]	0.0183559	0.0183559	0.0773773	0.0823308	0.00333775	0.0186842	0.00766021	0.0323003	0.000908553	0.000431212	0.000965774	0.000226038	0.000632894	0.0300932	0	0.000674875	0	5.49654e-07	0.00975524	0.00675398	0.000581061	0.000171283	0.00187167	0.000682644	0.000866879	0.000333659	6.43637e-05	0.00482172	0.00050376	0.00109967
alpha-farnesene	502-61-4	87	[3][6]	woody	[4]	0.025855	0.025855	0.0271661	0.0318842	0.035968	0.0499592	0.0289124	0.0322286	0.0274149	0.0265949	0.0262111	0.025855	0.026519	0.025855	0.026151	0.0417651	0.0259943	0.0261724	0.025855	0.0286321	0.025855	0.0261291	0.0263152	0.0265479	0.0261447	0.0269135	0.0261471	0.026952	0.0273175	0.0264802
(±)-camphor	76-22-2	250	[1]	minty	[13]	0.0105684	0.0105684	0.0356592	0.0559302	0.0662476	0.0113209	0.0108164	0.0287302	0.00399348	0	0	0.00198374	0.0014943	0	0	0.00160663	0	0	0	0.000267771	0	0	0.00396702	0.00691445	0.126646	0.00045031	1.84556e-05	0.00688504	0.00856708	0.0170498
butylated hydroxytoluene	128-37-0	1000	[1]	phenolic	[4]	0.0127959	0.0127959	0.0133735	0.0451901	0.0694473	0.0152517	0.00457422	0.0247755	0.016651	0.00268173	0.00133269	0.000857598	0.00538075	0	0.000752553	0.000342076	0.00146651	5.55216e-05	0	0.00043611	0	0	0.00014734	0.00215708	0.0015283	0.00229269	8.40281e-05	0.00590178	0.00690156	0.00211253
ethyl benzoate	93-89-0	53	[1]	minty	[4]	0.00798735	0.00798735	0.0125779	0.0559049	0.0312197	0.0178407	0.00955883	0.0204395	0.00494038	0.00087941	0.000512036	0.00115432	0.00187154	0.000979693	8.01982e-05	0.000799494	0.000227698	0.000176241	0.000717735	0.000496843	0	0.000394177	0.00238456	0.00281373	0.000667963	0.000281241	1.4221e-05	0.000330618	0.00114893	0.000892827
2-amino-5-methylbenzoic acid	2941-78-8	151000	[7]	/	/	0.00176629	0.00176629	0.00144466	0.00197457	0.002052	0.00170799	0.0013425	0.00172204	0.00455027	0.000333572	0.000750968	0.000498325	0.00153328	0.000381726	0.000180449	0.000268511	0.000307878	0.000515692	0.00106748	0.000453622	0.000147054	0.000232001	0.000253633	0.000644357	0.000180119	0.000239045	0.000322504	0.000205586	0.000583467	0.000311974
acenaphthene	83-32-9	80	[1]	/	/	0.00384243	0.00384243	0	0	0	0	0	0.00109784	0	0	0	0	0	0	0	0	0	0	0	0	0	0	0	0	0	0	0	0.00307592	0	0.000341769
1-butyl-1H-pyrrole	589-33-3	10000	[6]	roasted	[6]	0	0	0	0	0.00378321	0	0	0.000540458	0.000688154	0.000429674	0.0016425	0.00191054	0.00116772	0	0	0	0	0	0	0	0	0	0	0	0	0	0	0	0	0
hexadecane	544-76-3	13000000	[6]	chemical	[6]	1.34093e-06	1.34093e-06	1.46754e-06	8.29371e-06	5.88197e-06	2.54636e-06	7.56588e-07	3.08972e-06	3.10175e-07	4.4363e-07	1.73465e-07	2.66223e-07	2.98373e-07	3.09104e-07	1.41754e-07	1.64358e-07	9.59778e-08	9.80378e-08	2.22904e-07	1.72023e-07	1.69297e-07	8.77307e-08	1.13033e-07	1.12067e-07	2.40899e-07	4.86083e-08	4.63693e-08	1.60103e-07	1.0577e-07	1.20431e-07
longifolene	475-20-7	/	/	woody	[4]	0	0	0	0	0	0	0	0	0	0	0	0	0	0	0	0	0	0	0	0	0	0	0	0	0	0	0	0	0	0
alpha-cedrene	469-61-4	/	/	woody	[4]	0	0	0	0	0	0	0	0	0	0	0	0	0	0	0	0	0	0	0	0	0	0	0	0	0	0	0	0	0	0
gamma-muurolene	30021-74-0	/	/	woody	[4]	0	0	0	0	0	0	0	0	0	0	0	0	0	0	0	0	0	0	0	0	0	0	0	0	0	0	0	0	0	0
alpha-calacorene	21391-99-1	/	/	woody	[4]	0	0	0	0	0	0	0	0	0	0	0	0	0	0	0	0	0	0	0	0	0	0	0	0	0	0	0	0	0	0
ethyl palmitate	628-97-7	20000	[6]	waxy	[4]	0	0	0	0	0	0	0	0	0	0	0	0	0	0	6.99056e-05	0.000120266	0	3.33135e-05	0	3.72475e-05	0	5.94743e-06	3.85843e-06	0	0.000102377	7.84799e-05	7.24125e-06	0	0	2.19893e-05
delta-tetradecalactone	2721-22-4	/	/	waxy	[4]	0	0	0	0	0	0	0	0	0	0	0	0	0	0	0	0	0	0	0	0	0	0	0	0	0	0	0	0	0	0
methyl palmitate	112-39-0	4000000	[6]	waxy	[4]	0	0	0	0	0	0	0	0	0	2.32694e-06	4.57767e-06	1.13634e-06	2.01024e-06	1.233e-06	5.7567e-07	9.5571e-07	8.3009e-07	1.04243e-06	1.33346e-06	9.95061e-07	0	4.60427e-07	5.05724e-07	1.58692e-06	8.08193e-07	9.09263e-07	4.44204e-07	9.44979e-07	1.21909e-06	7.64311e-07
2,4-di-tert-butyl phenol	96-76-4	/	/	phenolic	[4]	0	0	0	0	0	0	0	0	0	0	0	0	0	0	0	0	0	0	0	0	0	0	0	0	0	0	0	0	0	0
(Z)-3-hexen-1-yl benzoate	25152-85-6	/	/	green	[4]	0	0	0	0	0	0	0	0	0	0	0	0	0	0	0	0	0	0	0	0	0	0	0	0	0	0	0	0	0	0
2,3-octane dione	585-25-1	/	/	green	[13]	0	0	0	0	0	0	0	0	0	0	0	0	0	0	0	0	0	0	0	0	0	0	0	0	0	0	0	0	0	0
alloocimene	673-84-7	/	/	floral	[4]	0	0	0	0	0	0	0	0	0	0	0	0	0	0	0	0	0	0	0	0	0	0	0	0	0	0	0	0	0	0
hexahydrofarnesyl acetone	502-69-2	/	/	floral	[4]	0	0	0	0	0	0	0	0	0	0	0	0	0	0	0	0	0	0	0	0	0	0	0	0	0	0	0	0	0	0
linalool oxide (pyranoid)	14049-11-7	/	/	floral	[4]	0	0	0	0	0	0	0	0	0	0	0	0	0	0	0	0	0	0	0	0	0	0	0	0	0	0	0	0	0	0
beta-homocyclocitral	472-66-2	/	/	camphoreous	[4]	0	0	0	0	0	0	0	0	0	0	0	0	0	0	0	0	0	0	0	0	0	0	0	0	0	0	0	0	0	0
fluorene	86-73-7	/	/	/	/	0	0	0	0	0	0	0	0	0	0	0	0	0	0	0	0	0	0	0	0	0	0	0	0	0	0	0	0	0	0
diisobutyl phthalate	84-69-5	/	/	/	/	0	0	0	0	0	0	0	0	0	0	0	0	0	0	0	0	0	0	0	0	0	0	0	0	0	0	0	0	0	0
2-vinyl-naphthalene	827-54-3	/	/	/	/	0	0	0	0	0	0	0	0	0	0	0	0	0	0	0	0	0	0	0	0	0	0	0	0	0	0	0	0	0	0
geraniolene	6709-39-3	/	/	/	/	0	0	0	0	0	0	0	0	0	0	0	0	0	0	0	0	0	0	0	0	0	0	0	0	0	0	0	0	0	0
2,7-dimethyl naphthalene	582-16-1	/	/	/	/	0	0	0	0	0	0	0	0	0	0	0	0	0	0	0	0	0	0	0	0	0	0	0	0	0	0	0	0	0	0
2-carene	554-61-0	/	/	/	/	0	0	0	0	0	0	0	0	0	0	0	0	0	0	0	0	0	0	0	0	0	0	0	0	0	0	0	0	0	0
beta-cedrene	546-28-1	/	/	/	/	0	0	0	0	0	0	0	0	0	0	0	0	0	0	0	0	0	0	0	0	0	0	0	0	0	0	0	0	0	0
2,4-dimethyl-3-ethylpyrrole	517-22-6	/	/	/	/	0	0	0	0	0	0	0	0	0	0	0	0	0	0	0	0	0	0	0	0	0	0	0	0	0	0	0	0	0	0
olivetol	500-66-3	/	/	/	/	0	0	0	0	0	0	0	0	0	0	0	0	0	0	0	0	0	0	0	0	0	0	0	0	0	0	0	0	0	0
2,6,10-trimethyltridecane	3891-99-4	/	/	/	/	0	0	0	0	0	0	0	0	0	0	0	0	0	0	0	0	0	0	0	0	0	0	0	0	0	0	0	0	0	0
pristane	1921-70-6	/	/	/	/	0	0	0	0	0	0	0	0	0	0	0	0	0	0	0	0	0	0	0	0	0	0	0	0	0	0	0	0	0	0
alpha-ylangene	14912-44-8	/	/	/	/	0	0	0	0	0	0	0	0	0	0	0	0	0	0	0	0	0	0	0	0	0	0	0	0	0	0	0	0	0	0
